# Supplementary material for: The Identification of Marker Genes for Predicting the Osteogenic Differentiation Potential of Mesenchymal Stromal Cells
Source: MDPI journal article supplement (doi:10.3390/cimb43030150), 2021-11-30
Supplement: s1 [file s1]

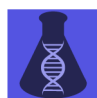

Article

# The Identification of Marker Genes for Predicting the Osteogenic Differentiation Potential of Mesenchymal Stromal Cells

Masami Kanawa <sup>1</sup>, Akira Igarashi <sup>2,3</sup>, Katsumi Fujimoto <sup>3,4</sup>, Tania Saskianti <sup>3,5</sup>, Ayumu Nakashima <sup>6</sup>, Yukihiro Higashi <sup>7</sup>, Hidemi Kurihara <sup>8</sup>, Yukio Kato <sup>3</sup> and Takeshi Kawamoto <sup>3,9,\*</sup>

**Table S1.** Donor information and passage numbers of cells used for RT-qPCR and differentiation analysis.

| donor ID | cell type | source | age | sex    | disease/operation                      | passage number |                   |
|----------|-----------|--------|-----|--------|----------------------------------------|----------------|-------------------|
|          |           |        |     |        |                                        | RT-qPCR        | differentiation n |
| 1        | FB        | skin   | 33  | female | healthy                                | 7              | 7                 |
| 2        | FB        | skin   | 29  | female | healthy                                | 11             | 11                |
| 3        | FB        | skin   | 45  | female | healthy                                | 10             | 10                |
| 4        | FB        | gum    | 18  | female | healthy                                | 6              | 6                 |
| 5        | MSC       | ilium  | 63  | male   | periodontitis                          | 3              | 4                 |
| 6        | MSC       | ilium  | 39  | male   | periodontitis                          | 3              | 4                 |
| 7        | MSC       | ilium  | 25  | male   | periodontitis                          | 5              | 4                 |
| 8        | MSC       | ilium  | 64  | male   | rebuilding of mandible                 | 4              | 4                 |
| 9        | MSC       | ilium  | 59  | male   | arteriosclerosis obliterans            | 4              | 4                 |
| 10       | MSC       | ilium  | 55  | male   | arteriosclerosis obliterans            | 5              | 4                 |
| 11       | MSC       | ilium  | 61  | male   | diabetes mellitus                      | 5              | 4                 |
| 12       | MSC       | ilium  | 53  | male   | Buerger's disease                      | 3              | 4                 |
| 13       | MSC       | ilium  | 81  | male   | arteriosclerosis obliterans            | 4              | 4                 |
| 14       | MSC       | jaw    | 63  | female | dental implant                         | 4              | 4                 |
| 15       | MSC       | jaw    | 36  | male   | fracture                               | 5              | 4                 |
| 16       | MSC       | jaw    | 36  | female | fracture                               | 5              | 4                 |
| 17       | MSC       | jaw    | 20  | male   | jaw movement for orthodontic treatment | 5              | 4                 |
| 18       | MSC       | jaw    | 28  | female | cyst removal                           | 4              | 4                 |

FB, fibroblasts; MSC, mesenchymal stromal cells.

**Table S2.** Characterization of cells used in this study.

| donor<br>ID | cell      | CD marker |      |      |      |      | differentiation<br>ability |    |    |
|-------------|-----------|-----------|------|------|------|------|----------------------------|----|----|
|             |           | CD105     | CD73 | CD90 | CD34 | CD14 | OS                         | CH | AD |
| 1           | FB        | +         | +    | +    | –    | –    | ±                          | –  | –  |
| 2           | FB        | +         | +    | +    | –    | –    | ±                          | –  | –  |
| 3           | FB        | +         | +    | +    | –    | –    | ±                          | –  | –  |
| 4           | FB        | +         | +    | +    | –    | –    | ±                          | –  | –  |
| 5           | ilium MSC | +         | +    | +    | –    | –    | +                          | +  | +  |
| 6           | ilium MSC | +         | +    | +    | –    | –    | +                          | +  | +  |
| 7           | ilium MSC | +         | +    | +    | –    | –    | +                          | +  | +  |
| 8           | ilium MSC | +         | +    | +    | –    | –    | +                          | +  | +  |
| 9           | ilium MSC | +         | +    | +    | –    | –    | +                          | +  | +  |
| 10          | ilium MSC | +         | +    | +    | –    | –    | +                          | +  | +  |
| 11          | ilium MSC | +         | +    | +    | –    | –    | +                          | +  | +  |
| 12          | ilium MSC | +         | +    | +    | –    | –    | +                          | +  | +  |
| 13          | ilium MSC | +         | +    | +    | –    | –    | +                          | +  | +  |
| 14          | jaw MSC   | +         | +    | +    | –    | –    | +                          | ±  | ±  |
| 15          | jaw MSC   | +         | +    | +    | –    | –    | +                          | ±  | ±  |
| 16          | jaw MSC   | +         | +    | +    | –    | –    | +                          | ±  | ±  |
| 17          | jaw MSC   | +         | +    | +    | –    | –    | +                          | ±  | ±  |
| 18          | jaw MSC   | +         | +    | +    | –    | –    | +                          | ±  | ±  |

FB, fibroblasts; MSC, mesenchymal stromal cells. OS, osteogenic differentiation; CH, chondrogenic differentiation; AD, adipogenic differentiation.

**Table S3.** Correlation between gene expression levels before osteogenic induction and ALP activities after induction of 13 cell lines (four fibroblast and nine mesenchymal stromal cell samples).

| donor ID number | 1      | 2      | 3      | 4      | 5       | 6       | 7       | 8       | 9        | 10       | 11       | 12     | 13       | <i>r</i> | <i>p</i> | probe set ID  |
|-----------------|--------|--------|--------|--------|---------|---------|---------|---------|----------|----------|----------|--------|----------|----------|----------|---------------|
| cell type       | FB     | FB     | FB     | FB     | MSC     | MSC     | MSC     | MSC     | MSC      | MSC      | MSC      | MSC    | MSC      |          |          |               |
| ALP (IU/μgDNA)  | 0.0205 | 0.0208 | 0.0251 | 0.0337 | 0.0681  | 0.1082  | 0.1118  | 0.1148  | 0.1182   | 0.1509   | 0.1624   | 0.1880 | 0.3219   |          |          |               |
| ACLY            | 1.00   | 1.49   | 1.91   | 1.60   | 2.40    | 1.02    | 6.06    | 3.86    | 6.04     | 6.07     | 5.59     | 6.30   | 5.35     | 0.705    | 0.007    | Hs00153764_m1 |
| ACVR2B          | 7.27   | 9.14   | 19.29  | 18.50  | 3.86    | 1.00    | 7.77    | 3.53    | 5.47     | 5.30     | 2.96     | 5.07   | 3.35     | -0.561   | 0.046    | Hs00609603_m1 |
| ADD3            | 1.02   | 1.00   | 4.98   | 1.97   | 4.17    | 1.47    | 4.34    | 2.74    | 3.59     | 3.79     | 4.07     | 3.45   | 4.54     | 0.480    | 0.097    | Hs00249890_m1 |
| AMD1            | 2.26   | 2.07   | 5.25   | 4.02   | 2.05    | 1.00    | 5.35    | 3.25    | 3.93     | 3.95     | 4.34     | 6.22   | 4.66     | 0.411    | 0.163    | Hs00750876_s1 |
| AMFR            | 2.61   | 2.51   | 9.28   | 7.81   | 2.06    | 1.00    | 4.90    | 1.76    | 3.69     | 3.71     | 4.88     | 3.29   | 2.66     | -0.293   | 0.332    | Hs00181609_m1 |
| API52           | 8.67   | 5.26   | 44.81  | 28.05  | 1.53    | 1.00    | 7.97    | 2.45    | 2.65     | 4.22     | 2.62     | 5.35   | 4.93     | -0.429   | 0.144    | Hs00705223_s1 |
| ARHGDIB         | 1.42   | 1.00   | 1.00   | 4.72   | 43.96   | 1.00    | 5.67    | 4.80    | 11.36    | 64.74    | 10.09    | 32.74  | 9.47     | 0.254    | 0.403    | Hs00171288_m1 |
| AURKB           | 3.38   | 2.76   | 1.38   | 1.45   | 1.00    | 1.12    | 4.18    | 5.28    | 5.24     | 7.25     | 1.44     | 10.68  | 1.68     | 0.260    | 0.391    | Hs00177782_m1 |
| AWP1            | 2.62   | 2.32   | 7.95   | 6.41   | 2.30    | 1.00    | 4.01    | 2.03    | 3.24     | 2.72     | 3.76     | 2.81   | 2.08     | -0.382   | 0.197    | Hs00180411_m1 |
| BMI1            | 1.09   | 1.91   | 5.58   | 3.29   | 1.35    | 1.00    | 4.31    | 2.10    | 3.19     | 2.02     | 3.77     | 3.60   | 2.63     | 0.053    | 0.865    | Hs00181626_m1 |
| BMP4            | 1.00   | 1.00   | 43.19  | 1.00   | 30.52   | 45.76   | 633.96  | 164.10  | 210.38   | 42.89    | 239.19   | 234.85 | 135.54   | 0.325    | 0.279    | Hs00259126_m1 |
| CCNB1           | 2.10   | 1.49   | 2.76   | 2.93   | 1.00    | 1.03    | 4.68    | 5.07    | 4.05     | 6.51     | 2.10     | 8.81   | 2.18     | 0.306    | 0.310    | Hs00277039_m1 |
| CCND1           | 3.23   | 1.32   | 9.83   | 4.59   | 3.35    | 1.33    | 11.16   | 1.00    | 1.65     | 1.77     | 4.10     | 5.83   | 4.68     | -0.007   | 0.983    | Hs00269961_m1 |
| CD74            | 3.35   | 1.00   | 3.85   | 1.00   | 374.54  | 210.65  | 169.91  | 339.70  | 440.14   | 1646.07  | 720.74   | 32.73  | 923.38   | 0.585    | 0.036    | Hs00173542_m1 |
| CD97            | 3.78   | 3.28   | 7.63   | 5.34   | 2.28    | 1.00    | 6.79    | 1.94    | 2.47     | 3.64     | 2.51     | 5.89   | 2.82     | -0.224   | 0.461    | Hs00415851_g1 |
| CDC20           | 9.87   | 10.22  | 4.04   | 5.28   | 4.37    | 1.00    | 7.80    | 9.13    | 7.19     | 11.94    | 2.71     | 15.51  | 3.35     | -0.038   | 0.902    | Hs00176481_m1 |
| CDKN2D          | 4.51   | 1.54   | 3.37   | 2.74   | 1.00    | 14.56   | 107.42  | 70.70   | 79.48    | 72.35    | 51.29    | 99.08  | 33.28    | 0.487    | 0.091    | Hs00193192_m1 |
| CDKN3           | 7.74   | 7.16   | 14.09  | 13.75  | 3.07    | 1.00    | 8.28    | 4.85    | 3.76     | 6.28     | 1.44     | 9.89   | 2.07     | -0.498   | 0.084    | Hs00164310_m1 |
| COL7A1          | 1.59   | 3.64   | 4.66   | 4.33   | 1.49    | 1.00    | 6.75    | 2.09    | 2.20     | 2.79     | 4.62     | 4.92   | 1.76     | -0.085   | 0.781    | Hs00170014_m1 |
| CTGF            | 3.60   | 1.56   | 2.62   | 1.00   | 57.34   | 17.51   | 19.45   | 30.32   | 25.20    | 17.51    | 35.88    | 31.88  | 32.32    | 0.520    | 0.069    | Hs00189392_m1 |
| DNC11           | 1.00   | 3.73   | 1.13   | 2.01   | 13.74   | 4.26    | 15.91   | 9.07    | 19.25    | 21.94    | 18.98    | 29.97  | 24.94    | 0.824    | 0.001    | Hs00181665_m1 |
| DPYSL3          | 1.00   | 3.32   | 3.82   | 3.40   | 2.63    | 1.01    | 3.34    | 2.46    | 4.94     | 4.32     | 5.42     | 4.02   | 4.47     | 0.472    | 0.104    | Hs00153451_m1 |
| E2F1            | 3.72   | 1.83   | 2.60   | 2.14   | 1.74    | 1.00    | 5.83    | 4.82    | 4.16     | 7.37     | 2.56     | 7.44   | 2.75     | 0.305    | 0.311    | Hs00173500_m1 |
| EDG2            | 1.59   | 4.64   | 6.33   | 5.42   | 1.93    | 1.00    | 20.15   | 3.22    | 3.47     | 3.70     | 4.06     | 4.56   | 4.26     | 0.008    | 0.978    | Hs00173857_m1 |
| EDG7            | 1.42   | 13.71  | 61.53  | 1.90   | 1.00    | 3.44    | 371.40  | 1.00    | 4.57     | 1.00     | 4.51     | 1.00   | 3.32     | -0.053   | 0.863    | Hs00251661_m1 |
| EFEMP1          | 1.00   | 1.00   | 1.00   | 1.00   | 5.06    | 5.28    | 3.15    | 10.34   | 8.41     | 24.85    | 12.75    | 6.85   | 3.99     | 0.373    | 0.210    | Hs00154952_m1 |
| EIF4G2          | 3.46   | 4.25   | 14.65  | 9.28   | 3.51    | 1.00    | 4.47    | 2.56    | 3.13     | 3.33     | 3.88     | 3.82   | 2.64     | -0.447   | 0.126    | Hs00169258_m1 |
| F2R             | 1.08   | 70.49  | 34.43  | 18.55  | 13.19   | 1.58    | 40.85   | 5.28    | 2.03     | 1.00     | 3.98     | 2.05   | 3.42     | -0.475   | 0.101    | Hs00246260_m1 |
| FLJ11175        | 1.00   | 5.03   | 9.57   | 5.05   | 2.30    | 3.93    | 75.94   | 21.06   | 48.35    | 4.10     | 28.14    | 28.73  | 23.13    | 0.325    | 0.278    | Hs00181306_m1 |
| FST             | 5.19   | 8.16   | 26.48  | 9.51   | 1.29    | 1.00    | 10.93   | 1.65    | 1.77     | 1.69     | 4.09     | 3.26   | 2.49     | -0.450   | 0.123    | Hs00178167_m1 |
| GABRB1          | 1.00   | 1.00   | 1.00   | 1.00   | 1.00    | 1.00    | 1.00    | 1.00    | 1.00     | 1.00     | 1.00     | 1.00   | 1.00     | -        | -        | Hs00173744_m1 |
| GMFG            | 4.68   | 7.29   | 12.42  | 10.09  | 12.53   | 1.00    | 51.36   | 23.92   | 13.14    | 282.29   | 7.36     | 10.11  | 23.65    | 0.184    | 0.547    | Hs00300159_m1 |
| GPR37           | 152.36 | 1.00   | 436.84 | 139.04 | 1.00    | 11.43   | 22.59   | 21.54   | 25.68    | 25.67    | 33.71    | 55.00  | 22.46    | -0.414   | 0.160    | Hs00219578_m1 |
| HGF             | 1.00   | 42.49  | 56.44  | 15.79  | 89.32   | 33.75   | 177.30  | 101.51  | 218.14   | 136.85   | 108.59   | 155.10 | 259.07   | 0.813    | 0.001    | Hs00734212_m1 |
| HLADRA          | 11.63  | 1.00   | 13.18  | 3.93   | 3581.96 | 3923.41 | 1850.79 | 6846.79 | 16390.07 | 31004.39 | 19316.54 | 182.51 | 38106.51 | 0.780    | 0.002    | Hs00244919_m1 |
| HLADRB          | 1.00   | 1.00   | 1.00   | 1.00   | 33.48   | 56.93   | 1.00    | 9.18    | 180.53   | 1.83     | 45.31    | 1.42   | 763.47   | 0.762    | 0.002    | Hs00277001_m1 |
| HNRPU           | 2.19   | 2.24   | 9.77   | 7.02   | 2.32    | 1.00    | 5.27    | 3.02    | 3.27     | 4.50     | 3.93     | 4.31   | 2.88     | -0.223   | 0.463    | Hs00197427_m1 |
| ICAM1           | 2.04   | 4.22   | 3.90   | 4.30   | 11.14   | 1.00    | 3.65    | 3.82    | 25.14    | 9.41     | 16.11    | 3.31   | 9.05     | 0.266    | 0.380    | Hs00153126_m1 |
| IFI44           | 1.99   | 1.00   | 13.04  | 8.78   | 3.69    | 2.18    | 7.99    | 8.21    | 9.56     | 10.30    | 4.76     | 8.29   | 6.45     | 0.140    | 0.649    | Hs00181213_m1 |
| IGF1            | 1.00   | 1.00   | 1.00   | 1.00   | 291.96  | 523.55  | 221.12  | 905.25  | 1943.51  | 348.11   | 1809.53  | 519.23 | 1096.70  | 0.560    | 0.046    | Hs00266026_m1 |
| IGFBP5          | 1.00   | 30.96  | 2.91   | 3.67   | 19.85   | 5.40    | 33.86   | 5.26    | 8.50     | 35.09    | 12.83    | 21.81  | 24.98    | 0.378    | 0.203    | Hs00152924_m1 |
| IGFBP7          | 1.00   | 2.79   | 8.58   | 7.19   | 39.96   | 23.39   | 46.19   | 92.64   | 94.15    | 76.48    | 54.04    | 50.86  | 27.42    | 0.395    | 0.181    | Hs00219878_m1 |
| IL13RA2         | 21.97  | 2.68   | 250.30 | 31.42  | 1.00    | 2.43    | 55.24   | 7.20    | 3.25     | 13.19    | 28.86    | 61.36  | 78.01    | -0.044   | 0.887    | Hs00233722_m1 |
| INPP5E          | 1.05   | 2.53   | 3.47   | 3.30   | 1.05    | 1.00    | 4.43    | 1.95    | 2.86     | 4.10     | 3.77     | 3.96   | 2.15     | 0.177    | 0.564    | Hs00233743_m1 |
| ITGA3           | 9.11   | 14.85  | 3.34   | 3.02   | 8.16    | 1.00    | 19.98   | 4.35    | 5.96     | 13.13    | 7.32     | 12.35  | 14.70    | 0.344    | 0.249    | Hs00173952_m1 |
| ITGA5           | 1.37   | 2.11   | 1.56   | 1.47   | 3.78    | 1.00    | 2.73    | 2.94    | 4.58     | 3.99     | 5.87     | 4.32   | 4.21     | 0.648    | 0.017    | Hs00363726_m1 |
| ITGA6           | 103.00 | 42.40  | 115.41 | 30.73  | 5.15    | 1.00    | 71.48   | 10.58   | 10.67    | 4.44     | 51.64    | 121.51 | 36.96    | -0.126   | 0.682    | Hs00222059_m1 |

|          |      |        |        |        |         |        |         |        |         |         |         |        |        |        |         |               |
|----------|------|--------|--------|--------|---------|--------|---------|--------|---------|---------|---------|--------|--------|--------|---------|---------------|
| KCNK12   | 1.00 | 1.00   | 3.96   | 1.00   | 1.00    | 1.00   | 1.00    | 1.00   | 1.00    | 1.00    | 1.00    | 1.00   | 1.00   | -0.305 | 0.311   | Hs00540818_s1 |
| KCNN2    | 1.00 | 1.00   | 3.98   | 1.00   | 1.00    | 1.00   | 6.80    | 1.00   | 1.00    | 1.00    | 1.00    | 1.19   | 1.00   | -0.134 | 0.661   | Hs00165042_m1 |
| KCTD12   | 1.00 | 3.91   | 9.61   | 3.36   | 26.68   | 8.82   | 53.00   | 14.20  | 39.63   | 30.33   | 24.41   | 27.94  | 37.40  | 0.617  | 0.025   | Hs00174497_m1 |
| LAMA3    | 1.16 | 5.72   | 1.00   | 1.05   | 6.29    | 19.63  | 56.60   | 13.88  | 27.28   | 7.92    | 49.34   | 23.02  | 27.70  | 0.522  | 0.067   | Hs00171455_m1 |
| LEPR     | 1.00 | 8.24   | 11.70  | 4.05   | 4.09    | 3.37   | 63.62   | 10.69  | 6.61    | 71.54   | 6.75    | 4.66   | 8.28   | 0.130  | 0.671   | Hs00182998_m1 |
| LIF      | 1.00 | 3.49   | 1.00   | 1.00   | 44.77   | 23.36  | 139.18  | 96.91  | 148.11  | 135.85  | 72.72   | 149.96 | 86.80  | 0.614  | 0.025   | Hs00174838_m1 |
| LRP8     | 2.01 | 3.95   | 4.10   | 2.11   | 2.01    | 1.00   | 8.67    | 2.04   | 4.55    | 2.00    | 5.16    | 8.21   | 4.42   | 0.331  | 0.269   | Hs00198823_m1 |
| MCAM     | 5.27 | 19.66  | 2.47   | 1.00   | 110.42  | 64.75  | 80.98   | 147.90 | 168.47  | 521.31  | 398.81  | 483.48 | 586.28 | 0.889  | 0.00005 | Hs00428518_m1 |
| MCM5     | 8.15 | 7.03   | 5.89   | 3.60   | 3.83    | 1.00   | 5.43    | 4.92   | 3.96    | 6.46    | 2.17    | 8.18   | 2.45   | -0.330 | 0.270   | Hs00217924_m1 |
| MCM7     | 5.22 | 3.62   | 3.86   | 2.89   | 4.18    | 1.00   | 7.26    | 5.64   | 4.07    | 6.76    | 2.99    | 8.01   | 2.89   | 0.080  | 0.794   | Hs00179899_m1 |
| MGC5306  | 1.02 | 1.22   | 3.05   | 1.15   | 1.25    | 1.00   | 5.71    | 2.69   | 2.96    | 2.68    | 3.47    | 3.99   | 3.13   | 0.471  | 0.104   | Hs00741286_m1 |
| MGP      | 1.00 | 2.04   | 15.57  | 1.59   | 123.43  | 86.15  | 151.52  | 51.82  | 979.77  | 160.54  | 662.92  | 37.15  | 205.98 | 0.289  | 0.339   | Hs00204417_m1 |
| MICA     | 1.00 | 1.92   | 2.79   | 2.04   | 1.65    | 1.37   | 3.72    | 2.34   | 3.88    | 3.58    | 5.24    | 8.39   | 2.38   | 0.427  | 0.146   | Hs00852569_g1 |
| NDUFA8   | 4.44 | 3.47   | 16.43  | 11.58  | 2.92    | 1.00   | 4.19    | 2.04   | 3.62    | 4.38    | 3.52    | 5.21   | 3.79   | -0.365 | 0.220   | Hs00168558_m1 |
| NFE2L3   | 5.22 | 6.15   | 14.59  | 9.28   | 9.18    | 1.00   | 8.92    | 5.51   | 6.59    | 20.47   | 3.37    | 9.88   | 6.81   | -0.029 | 0.926   | Hs00159686_m1 |
| NPR3     | 1.43 | 6.75   | 10.09  | 1.00   | 96.75   | 97.94  | 187.65  | 212.87 | 84.96   | 640.36  | 99.33   | 137.09 | 128.03 | 0.372  | 0.211   | Hs00188349_m1 |
| NT5E     | 3.20 | 2.33   | 12.02  | 7.28   | 3.26    | 1.00   | 15.55   | 2.48   | 3.19    | 4.26    | 3.16    | 9.67   | 4.50   | -0.040 | 0.898   | Hs00172183_m1 |
| P4HA2    | 1.00 | 1.50   | 2.58   | 1.91   | 2.02    | 2.18   | 1.38    | 2.87   | 8.12    | 1.51    | 9.48    | 9.22   | 7.65   | 0.669  | 0.012   | Hs00175051_m1 |
| PGR      | 1.44 | 4.49   | 19.40  | 4.67   | 1.00    | 1.39   | 73.41   | 1.00   | 4.12    | 2.24    | 1.31    | 4.51   | 4.31   | -0.056 | 0.857   | Hs00170182_m1 |
| PGRMC2   | 5.33 | 5.34   | 18.52  | 16.75  | 3.88    | 1.00   | 6.58    | 2.87   | 3.51    | 3.63    | 5.31    | 3.31   | 3.60   | -0.473 | 0.103   | Hs00356977_m1 |
| PLAU     | 1.00 | 897.17 | 347.23 | 333.23 | 3019.26 | 264.08 | 1160.75 | 916.28 | 1838.36 | 1259.14 | 1187.44 | 450.06 | 637.77 | 0.037  | 0.906   | Hs00172888_m1 |
| PLEC1    | 2.62 | 3.05   | 5.97   | 5.22   | 4.01    | 1.00   | 5.53    | 1.82   | 1.83    | 3.64    | 3.83    | 4.19   | 2.96   | -0.192 | 0.530   | Hs00160444_m1 |
| PQBP1    | 1.00 | 3.69   | 21.81  | 23.43  | 3.18    | 1.00   | 5.95    | 3.47   | 3.71    | 4.98    | 4.29    | 5.01   | 3.22   | -0.368 | 0.216   | Hs00176952_m1 |
| SRGN     | 1.14 | 2.10   | 1.00   | 1.49   | 146.54  | 26.33  | 62.83   | 62.36  | 92.16   | 156.23  | 134.47  | 110.28 | 141.90 | 0.727  | 0.005   | Hs00165590_m1 |
| PRKAG1   | 1.60 | 1.66   | 5.32   | 4.31   | 1.44    | 1.00   | 5.85    | 2.75   | 4.46    | 5.59    | 4.56    | 5.38   | 3.96   | 0.334  | 0.265   | Hs00267687_m1 |
| PROS1    | 1.13 | 1.00   | 8.99   | 5.20   | 2.35    | 5.71   | 14.51   | 12.68  | 23.04   | 9.81    | 23.04   | 8.82   | 8.62   | 0.380  | 0.200   | Hs00267896_m1 |
| PSMC5    | 1.48 | 1.30   | 3.34   | 2.72   | 1.00    | 1.19   | 5.76    | 3.66   | 5.14    | 6.34    | 5.32    | 7.44   | 4.44   | 0.589  | 0.034   | Hs00357247_g1 |
| RAB3B    | 2.93 | 6.57   | 16.05  | 11.08  | 1.00    | 1.23   | 40.65   | 3.43   | 3.17    | 1.94    | 4.94    | 9.24   | 5.77   | -0.076 | 0.805   | Hs00192380_m1 |
| RRM2     | 1.95 | 1.76   | 1.80   | 1.28   | 1.00    | 0.74   | 4.47    | 4.46   | 4.12    | 6.12    | 1.53    | 6.78   | 1.55   | 0.281  | 0.352   | Hs00190794_m1 |
| SERPINI1 | 1.00 | 2.77   | 13.13  | 1.19   | 8.09    | 14.48  | 81.41   | 20.69  | 37.20   | 8.56    | 58.80   | 72.28  | 70.59  | 0.724  | 0.005   | Hs00193673_m1 |
| SLC16A4  | 1.00 | 6.50   | 5.26   | 3.34   | 6.27    | 2.06   | 16.80   | 4.47   | 5.92    | 14.34   | 6.81    | 6.77   | 9.12   | 0.389  | 0.189   | Hs00197884_m1 |
| SLC20A1  | 1.73 | 1.99   | 5.81   | 4.19   | 6.95    | 1.00   | 7.63    | 3.26   | 4.29    | 3.57    | 4.17    | 8.01   | 6.38   | 0.389  | 0.189   | Hs00366488_m1 |
| SLC2A1   | 1.00 | 2.89   | 1.28   | 1.34   | 7.48    | 1.23   | 4.44    | 4.58   | 6.90    | 7.42    | 5.87    | 6.55   | 4.16   | 0.456  | 0.117   | Hs00183386_m1 |
| SLCO1A2  | 1.00 | 1.00   | 1.00   | 1.00   | 1.00    | 1.00   | 1.00    | 1.00   | 1.00    | 1.00    | 9.29    | 1.00   | 1.00   | 0.182  | 0.552   | Hs00225533_m1 |
| SPRY2    | 1.16 | 1.17   | 8.43   | 3.07   | 2.00    | 1.00   | 7.02    | 1.88   | 2.39    | 4.36    | 2.45    | 3.96   | 2.31   | -0.062 | 0.841   | Hs00232525_m1 |
| TCF19    | 6.10 | 3.67   | 3.10   | 2.65   | 2.97    | 1.00   | 3.68    | 3.58   | 3.21    | 4.09    | 1.79    | 7.14   | 1.98   | -0.134 | 0.662   | Hs00197918_m1 |
| TFPI2    | 1.00 | 2.19   | 6.99   | 1.10   | 37.27   | 6.22   | 13.07   | 4.15   | 11.36   | 40.32   | 9.29    | 37.07  | 34.66  | 0.620  | 0.024   | Hs00190278_m1 |
| TGM2     | 1.00 | 6.93   | 2.94   | 1.40   | 398.85  | 38.40  | 100.31  | 166.17 | 314.09  | 555.61  | 148.05  | 114.79 | 101.72 | 0.253  | 0.404   | Hs00165949_m1 |
| TIMP3    | 1.00 | 1.22   | 15.39  | 11.10  | 2.27    | 2.73   | 3.24    | 3.45   | 3.65    | 1.16    | 6.23    | 4.72   | 3.52   | -0.229 | 0.452   | Hs00177406_m1 |
| TK1      | 7.63 | 8.65   | 7.37   | 4.72   | 3.60    | 1.00   | 10.24   | 5.42   | 5.25    | 10.30   | 2.12    | 11.22  | 3.30   | -0.146 | 0.635   | Hs00222224_m1 |
| TRIB2    | 2.43 | 1.00   | 3.57   | 3.86   | 13.15   | 4.43   | 19.54   | 15.42  | 21.05   | 20.97   | 13.11   | 18.21  | 13.25  | 0.579  | 0.038   | Hs00188500_m1 |
| TRIP13   | 2.73 | 2.24   | 4.11   | 3.60   | 1.00    | 1.11   | 5.92    | 5.18   | 4.13    | 6.74    | 2.36    | 8.28   | 2.15   | 0.179  | 0.559   | Hs00853610_g1 |
| UBE2C    | 2.08 | 2.03   | 2.13   | 1.39   | 1.11    | 1.00   | 4.94    | 7.90   | 5.72    | 7.87    | 2.11    | 10.38  | 2.40   | 0.343  | 0.251   | Hs00819350_m1 |
| UBE2S    | 4.67 | 8.37   | 4.93   | 5.76   | 5.83    | 7.43   | 3.31    | 3.95   | 5.82    | 1.00    | 10.16   | 0.078  | 5.27   | 0.078  | 0.801   | Hs00188233_m1 |
| UCHL1    | 3.42 | 17.51  | 1.71   | 1.00   | 6.68    | 6.53   | 5.78    | 8.27   | 5.30    | 1.40    | 11.40   | 0.428  | 9.46   | 0.428  | 0.144   | Hs00182461_m1 |
| VLDLR    | 9.15 | 6.90   | 9.17   | 3.40   | 4.56    | 6.91   | 5.65    | 3.50   | 3.29    | 1.00    | 6.26    | 0.034  | 22.63  | 0.034  | 0.912   | Hs00183662_m1 |
| WIF1     | 1.00 | 2.93   | 14.36  | 2.65   | 1.92    | 1.59   | 1.00    | 1.00   | 1.20    | 1.00    | 1.14    | -0.330 | 1.68   | -0.330 | 0.270   | Hs00375275_m1 |
| ZNF185   | 7.85 | 3.92   | 4.77   | 23.85  | 4.95    | 3.83   | 2.23    | 8.28   | 3.67    | 1.00    | 8.20    | -0.189 | 5.68   | -0.189 | 0.535   | Hs00200253_m1 |

*r*, Pearson correlation coefficient; FB, fibroblasts; MSC, ilium mesenchymal stromal cells.

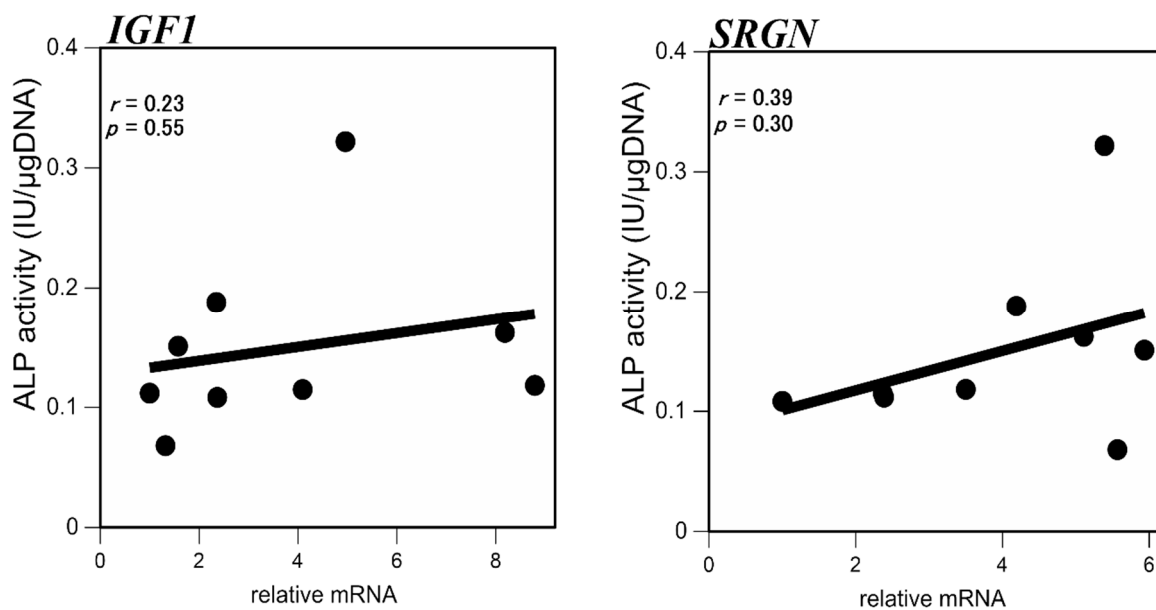

**Figure S1.** Correlation between *IGF1* or *SRGN* mRNA levels before osteogenic induction and ALP activities after induction of nine ilium mesenchymal stromal cell samples.  $r$ , Pearson correlation coefficient.
